# Supplementary material
Source: publisher figshare collection journal article supplement (https://gsajournals.figshare.com/ndownloader/files/22286841)
Supplement: Supplementary file 1 [file 22286841]

## Sheet: Sheet1
	Female	Female	Female	Female	Male	Male	Male	Male
	Early	Early	Late	Late	Early	Early	Late	Late
		-0.1		-0.1		-0.1		-0.1
0 CO	331	335	184	190	129	141	126	137
1 CO only	316	316	220	220	211	211	228	228
2 only	36	32	55	49	99	89	88	79
More Than 2	2	2	6	6	21	19	23	21
Total CO	354	350	281	275	331	319	339	328
	354	350	281	275	331	319	339	328
Total Count	685	685	465	465	460	460	465	465
	Rate	Rate	Rate	Rate	Rate	Rate	Rate	Rate
	0.516788	0.510949	0.604301	0.591398	0.719565	0.693478	0.729032	0.705376
	Ratio
	1.39238	1.35724	1.20641	1.19273
	Drop in mCO:fCO (as per Toyota paper)	Drop in mCO:fCO (as per Toyota paper, but with additional CO numbers reduced by 10%)
	0.133565	0.121209
